# Supplementary material for: Comparison of Comprehensive Genomic Profiling Testing “Ion Torrent Genexus Sequencer” with FoundationOne
Source: Research Square preprint supplement (doi:10.21203/rs.3.rs-3974639/v1), 2024-02-29
Supplement: Supplementary file 1 [file eb3836236a3977a2dac4710c.xlsx]

## Sheet: T1
Table 1 . Patients' characteristic
Patient	Sample	Age	Sex	Primary tumor	Pathological diagnosis	Disease status at testing
1	Tissue	64	Female	Breast	Invasive lobular carcinoma	Recurrence with multiple liver metastases
2	Tissue	58	Female	Breast	Invasive ductal carcinoma	Recurrence with multiple liver metastases
3	Tissue	42	Male	Parotid gland	Secretory carcinoma	Recurrence with lung metastases
4	Blood	74	Female	Breast	Invasive ductal carcinoma	Stage IV with bone metastasis
5	Blood	50	Female	Breast	Invasive ductal carcinoma	Stage IV with bone metastasis
6	Blood	71	Female	Breast	Invasive ductal carcinoma	Stage IV with bone and lung metastases

## Sheet: T2
Table 2. Sensitivity, specificity, and positive predictive value of Genexus vs. Founcation one
	Concordance rate	Sensitivity	Specificity	Positive predictive value	Negative predictive value
OCA v3 + OPA	0.985	0.77	0.99	0.66	0.986979
OCA v3 (tissue)	0.967	0.89	0.994751	0.8	0.986979
OPA (blood)	0.981	0.5	0.97	0.4	0.98

## Sheet: T3
Table 3. List of somatic variants comparing Genexus vs FoundationOne
Case	Primary tumor	Sample	Concordance	Gene	Mutation	Genexus	FoundationOne
						Alelle freq(%) or # of lead/copy	Alelle freq(%) or # of lead/copy
1	Breast	Tissue	G and F	PTEN	T319Nfs*6	29.6	28.01
			G and F	CREBBP	S2377*	14.5	10.51
			G※and F	PIK3CA	P449_L452del	28	16.9
			F	TP53	Q331*	Not detected	8.2
2	Breast	Tissue	G and F	PIK3CA	H1047R	10.3	0.54
			G※ and F	TP53	L257_E258>Q	7.4	14.7
			G※ and F	MYC	MYC (CNA)	13.3 copies	8 copy
3	Head and neck	Tissue	G and F	NOTCH2	L2135fs*7	26.8	15.38
			G and F	ETV6-NTRK3	ETV6-NTRK3	442876 leads	Detected
			G	AKT3	AKT3 (CNA)	7.85 copies	Not detected
			G	MYC	MYC (CNA)	8.05 copies	Not detected
4	Breast	Blood	G and F	PIK3CA	H1047R	0.9815	0.54
			G and F	ESR1	E380Q	0.8149	0.55
			G	MAP2K1	F53V	0.0675	Not detected
			G	ESR-CCDC170	ESR-CCDC170	38 leads	Not detected
5	Breast	Blood	G and F	-	-	Not detected	Not detected
6	Breast	Blood	G and F	TP53	H214P	1.04	0.14
			F	KRAS	G12V	Not detected	0.15
G indicates variants detected in Gnexus. F indicates variants detected in FoundaitonOne. G and F indicates variants detected in both Gnexus and FoundationOne. ※ indicates that the variants were not listed in standard reports but were called in the original results. B, bleed; F, FoudationOne; G, Genexus; T, tissue.
